# Supplementary material for: An internet-based multidisciplinary online medical consultation system to help cope with pediatric medical needs during the COVID-19 outbreak: a cross-sectional study
Source: PubMed Central journal article supplement — Transl Pediatr. 2021 Mar;10(3):560–8. doi: 10.21037/tp-20-348 (PMC8039788; doi:10.21037/tp-20-348), 2021-03
Supplement: tp-10-03-560-dss.pdf [file tp-10-03-560-dss.pdf]

## Data Sharing Statement

|                     |                                                                                                                                                     |                                                                                                                  |
|---------------------|-----------------------------------------------------------------------------------------------------------------------------------------------------|------------------------------------------------------------------------------------------------------------------|
| <b>Article Info</b> | <a href="http://dx.doi.org/10.21037/tp-20-348">http://dx.doi.org/10.21037/tp-20-348</a> .                                                           |                                                                                                                  |
| <b>Item</b>         | <b>Question</b>                                                                                                                                     | <b>Authors' Response<br/>(place "-" if not applicable)</b>                                                       |
| 1                   | Would you like to share data collected for your study to others?                                                                                    | Yes                                                                                                              |
| 2                   | If not, would you like to share the reason for your decision?                                                                                       |                                                                                                                  |
| 3                   | What data in particular will be shared?                                                                                                             | The complementart effects of online medical service on traditional medical system.                               |
| 4                   | Any other documents will be shared? Such as study protocol, statistical analysis plan, informed consent form, clinical study report, analytic code. | None                                                                                                             |
| 5                   | When will data availability begin?                                                                                                                  | From the publication date                                                                                        |
| 6                   | When will data availability end?                                                                                                                    | Two years within the publication date.                                                                           |
| 7                   | To whom will you share the data?                                                                                                                    | Medical experts who are interested in online service                                                             |
| 8                   | For what type of analysis or purpose?                                                                                                               | For analysis the value of online medical service                                                                 |
| 9                   | How or where can the data/documents be obtained?                                                                                                    | Emails could be sent to the address below to obtain the shared data:<br>marinezyh@163.com.                       |
| 10                  | Any other restrictions?                                                                                                                             | We may balance the potential benefits and risks for each request and then provide the data that could be shared. |
